# Supplementary material
Source: PubMed Central journal article supplement (PMC2883854)
Supplement: es1001133_si_001.pdf [file es1001133_si_001.pdf]

Supporting Information for:

***IN VITRO* STUDIES EVALUATING LEACHING OF MERCURY FROM MINE WASTE CALCINE USING SIMULATED HUMAN BODY FLUIDS**

John E. Gray<sup>1\*</sup>, Geoffrey S. Plumlee<sup>1</sup>, Suzette A. Morman<sup>1</sup>, Pablo L. Higuera<sup>2</sup>, James G. Crock<sup>1</sup>, Heather A. Lowers<sup>1</sup>, and Mark L. Witten<sup>3</sup>

---

<sup>1</sup>U.S. Geological Survey, P.O. Box 25046, MS 973, Denver, CO 80225 USA

<sup>2</sup>Universidad de Castilla-La Mancha, Plaza M. Meca 1, 13400 Almadén, Spain

<sup>3</sup>Department of Pediatrics, University of Arizona, Tucson, AZ, 85724, USA

---

\*Address correspondence to John E. Gray, U.S. Geological Survey, P.O. Box 25046, MS 973, Denver, CO 80225 USA. Telephone: (303) 236-2446. Fax: (303) 236-3200. Email: [jgray@usgs.gov](mailto:jgray@usgs.gov).

Contents:

Total number of pages: 3

Number of tables: 2

Table captions—

Supporting Information—SI Table S1. Mineralogical data for Almadén and Terlingua calcine samples. XRD=X-ray defraction analysis, SEM=Scanning electron microscopy, EMP=electron microprobe analysis. Almadén samples are those with the abbreviation AMJ (Almadenejos mine) and ALM (Almadén mine) and Terlingua samples are TER (Terlingua mine, also known as Chisos), SB (Study Butte mine), MAR (Mariposa mine), and MSM (Mariscal mine).

Supporting Information—SI Table S2. Cell viability data of activated rat lung epithelial (RLE) cells following exposure to leachates of Hg mine calcine.

Supporting Information—SI Table S1. Mineralogical data for Almadén and Terlingua calcine samples. XRD=X-ray defraction analysis, SEM=Scanning electron microscopy, EMP=electron microprobe analysis.

| Mineral or Compound                                                                          | ALMADÉN |       |       |       |       |       |       | TERLINGUA, |       |       |       |       |       |       |       | Analysis      |
|----------------------------------------------------------------------------------------------|---------|-------|-------|-------|-------|-------|-------|------------|-------|-------|-------|-------|-------|-------|-------|---------------|
|                                                                                              | AMJ01   | AMJ02 | ALM02 | ALM03 | ALM04 | ALM06 | ALM07 | SB4        | SB1   | MAR1  | MAR2  | TER1  | MSM1  | MSM3  | MSM5  |               |
| Quartz (SiO <sub>2</sub> )                                                                   | >25%    | >25%  | >25%  | 5-25% | >25%  | >25%  | >25%  | <5%        | <5%   | 5-25% | >25%  | 5-25% | 5-25% | 5-25% | 5-25% | XRD           |
| Calcite (CaCO <sub>3</sub> )                                                                 | <5%     | 5-25% | <5%   | n.i.  | <1%   | <1%   | n.i.  | n.i.       | 5-25% | >25%  | >25%  | n.i.  | >25%  | >25%  | >25%  | XRD           |
| Hematite (Fe <sub>2</sub> O <sub>3</sub> )                                                   | n.i.    | n.i.  | 5-25% | 5-25% | <5%   | <5%   | <5%   | <5%        | <1%   | <5%   | <5%   | n.i.  | <5%   | <5%   | <5%   | XRD           |
| Muscovite (KAl <sub>2</sub> (AlSi <sub>3</sub> )O <sub>10</sub> (OH) <sub>2</sub> )          | <5%     | <5%   | 5-25% | 5-25% | 5-25% | 5-25% | 5-25% | n.i.       | n.i.  | <1%   | <5%   | n.i.  | 5-25% | 5-25% | 5-25% | XRD           |
| Gypsum (CaSO <sub>4</sub> ·2H <sub>2</sub> O)                                                | <5%     | 5-25% | n.i.  | 5-25% | <5%   | <5%   | <1%   | 5-25%      | >25%  | <5%   | 5-25% | >25%  | 5-25% | 5-25% | 5-25% | XRD           |
| Jarosite (KFe <sup>3+</sup> <sub>3</sub> (OH) <sub>6</sub> (SO <sub>4</sub> ) <sub>2</sub> ) | n.i.    | 5-25% | <5%   | 5-25% | n.i.  | <5%   | <1%   | n.i.       | <5%   | n.i.  | <5%   | <5%   | n.i.  | n.i.  | n.i.  | XRD           |
| Kaolinite (Al <sub>2</sub> Si <sub>2</sub> O <sub>5</sub> (OH) <sub>4</sub> )                | <5%     | <5%   | <5%   | 5-25% | <5%   | 5-25% | <5%   | <1%        | <1%   | 5-25% | 5-25% | <5%   | n.i.  | <5%   | >25%  | XRD           |
| Feldspar (KAlSi <sub>3</sub> O <sub>8</sub> )                                                | <5%     | <5%   | <5%   | <5%   | <5%   | 5-25% | <1%   | >25%       | 5-25% | >25%  | n.i.  | <5%   | n.i.  | n.i.  | n.i.  | XRD           |
| Cinnabar (HgS, hexagonal)                                                                    | <1%     | <1%   | <1%   | <1%   | <1%   | n.i.  | <1%   | <1%        | <1%   | <1%   | P     | <1%   | P     | P     | P     | XRD, SEM, EMP |
| Metacinnabar (HgS, isometric)                                                                | <1%     | P     | n.i.  | P     | n.i.  | n.a.  | n.a.  | P          | P     | n.i.  | n.i.  | P     | n.a.  | n.a.  | P     | XRD, SEM, EMP |
| Corderoite (Hg <sub>3</sub> S <sub>2</sub> Cl <sub>2</sub> )                                 | <1%     | n.i.  | n.i.  | n.i.  | n.i.  | n.a.  | n.a.  | n.i.       | P?    | n.i.  | n.i.  | n.i.  | n.a.  | n.a.  | n.i.  | XRD, SEM, EMP |
| Calomel (Hg <sub>2</sub> Cl <sub>2</sub> )                                                   | <1%     | <1%   | n.i.  | P     | <1%   | n.a.  | n.a.  | n.i.       | n.i.  | n.i.  | n.i.  | n.i.  | n.a.  | n.a.  | n.i.  | XRD, SEM, EMP |
| Elemental Hg (Hg <sup>0</sup> )                                                              | n.i.    | n.i.  | n.i.  | n.i.  | n.i.  | n.a.  | n.a.  | n.i.       | n.i.  | n.i.  | n.i.  | P     | n.a.  | n.a.  | n.i.  | SEM           |
| Montroydite (HgO)                                                                            | n.i.    | n.i.  | n.i.  | P     | P     | n.a.  | n.a.  | n.i.       | n.i.  | n.i.  | n.i.  | n.i.  | n.a.  | n.a.  | n.i.  | SEM           |
| Kleinite (Hg <sub>2</sub> N(Cl,SO <sub>4</sub> )·n(H <sub>2</sub> O))                        | P       | P     | n.i.  | P     | P     | n.a.  | n.a.  | n.i.       | P     | n.i.  | n.i.  | P     | n.a.  | n.a.  | P     | SEM           |
| Terlinguaite (Hg <sup>+</sup> Hg <sup>2+</sup> ClO)                                          | P       | n.i.  | n.i.  | n.i.  | P     | n.a.  | n.a.  | n.i.       | P     | n.i.  | n.i.  | n.i.  | n.a.  | n.a.  | n.i.  | SEM           |
| Gianellaite (Hg <sub>4</sub> (SO <sub>4</sub> )N <sub>2</sub> )                              | n.i.    | n.i.  | n.i.  | P     | n.i.  | n.a.  | n.a.  | n.i.       | n.i.  | n.i.  | n.i.  | n.i.  | n.a.  | n.a.  | n.i.  | SEM           |

n.i. = sample was analyzed, but this mineral was not identified, P = present, n.a. = not analyzed

Supporting Information, SI Table S2.

| Sample # | % of Control | Error     | Mean # cells counted |
|----------|--------------|-----------|----------------------|
| Control  | 100          | $\pm 20$  | 13627                |
| AMJ01    | 102          | $\pm 20$  | 13927                |
| AMJ02    | 34           | $\pm 6.8$ | 4577                 |
| ALM04    | 54           | $\pm 11$  | 7368                 |
| ALM03    | 79           | $\pm 16$  | 10699                |
| ALM06    | 66           | $\pm 13$  | 8996                 |
| ALM07    | 88           | $\pm 18$  | 11976                |
| TER1     | 117          | $\pm 23$  | 15901                |
| SB4      | 98           | $\pm 20$  | 13341                |
| SB1      | 75           | $\pm 15$  | 10235                |
| MAR1     | 64           | $\pm 13$  | 8732                 |
| MAR2     | 67           | $\pm 13$  | 9169                 |
| MSM1     | 73           | $\pm 15$  | 9960                 |
| MSM3     | 76           | $\pm 15$  | 10316                |
| MSM5     | 91           | $\pm 18$  | 12445                |
